## CORRECTION

# Correction: CIP2A acts as a scaffold for CEP192-mediated microtubule organizing center assembly by recruiting Plk1 and aurora A during meiotic maturation (doi:10.1242/dev.158584)

HaiYang Wang, Min Ho Choe, In-Won Lee, Suk Namgoong, Jae-Sung Kim, Nam-Hyung Kim and Jeong Su Oh

There was an error published in *Development* (2017) **144**, 3829-3839 (doi:10.1242/dev.158584).

In Fig. 4E, the incorrect Plk1 image was displayed for dsCIP2A+hCIP2A (it was a duplicate of the dsEGFP image). The corrected Fig. 4E appears below.

This error does not affect the conclusions of the paper. The authors apologise to readers for this mistake.

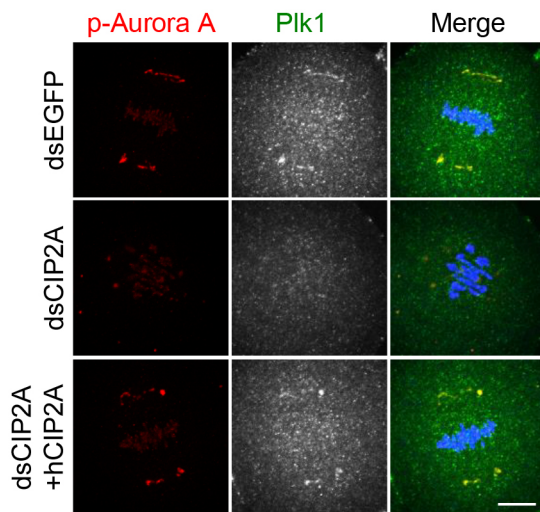

Source: https://cob.silverchair.com/dev/article-pdf/1854888/dev164483.pdf
